# Supplementary material for: The identification of age-associated cancer markers by an integrative analysis of dynamic DNA methylation changes
Source: PubMed Central journal article supplement (PMC4779991; doi:10.1038/srep22722), 2016-03-07
Supplement: srep22722-s1.pdf [file srep22722-s1.pdf]

# The identification of age-associated cancer markers by an integrative analysis of dynamic DNA methylation changes

Yihan Wang<sup>1\*</sup>, Jingyu Zhang<sup>2\*</sup>, Xingjun Xiao<sup>3\*</sup>, Hongbo Liu<sup>1</sup>, Fang Wang<sup>1</sup>, Song Li<sup>1</sup>, Yanhua Wen<sup>1</sup>, Yanjun Wei<sup>1</sup>, Jianzhong Su<sup>1</sup>, Yunming Zhang<sup>2</sup>, Yan Zhang<sup>1</sup>

<sup>1</sup>College of Bioinformatics Science and Technology, Harbin Medical University, Harbin, 150081, China.

<sup>2</sup>Department of Gerontology, The First Affiliated Hospital of Harbin Medical University, Harbin 150001, China.

<sup>3</sup>Department of Neurology, The Second Affiliated Hospital of Harbin Medical University, 246 Xuefu Road, Harbin 150086, China

## Supplementary Figures

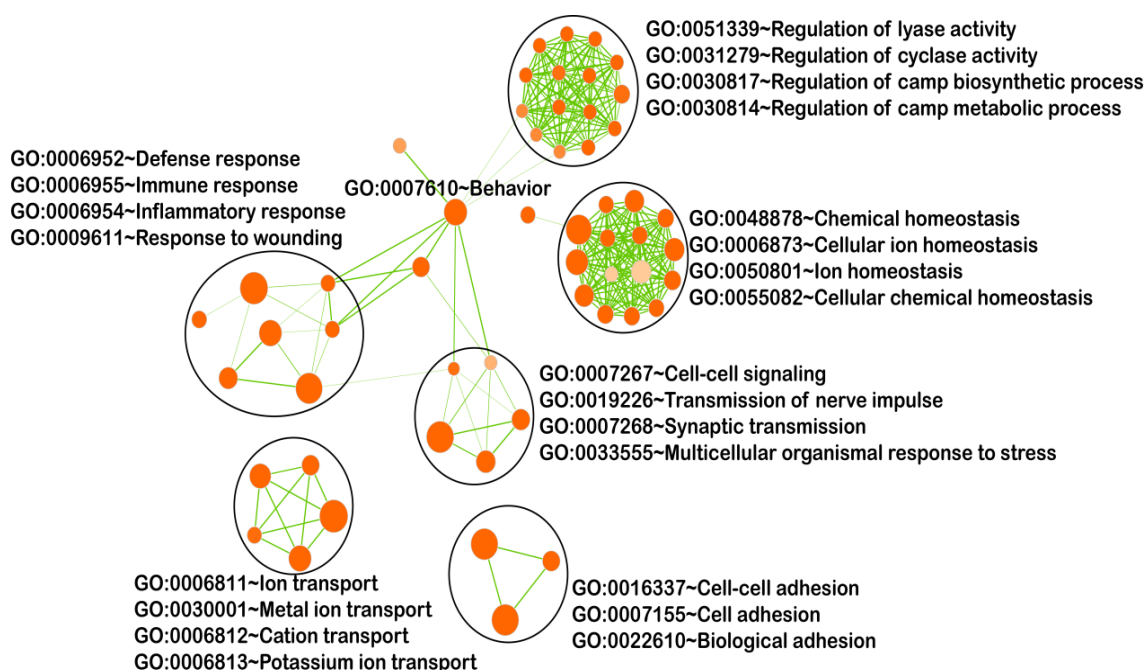

**Supplementary Fig. S1 GO biological process enrichment analysis for cDMGs by DAVID.** The size of a node represented the number of enriched genes in this term, and the color of a node represented the Bonferroni adjusted p-value of this GO term.

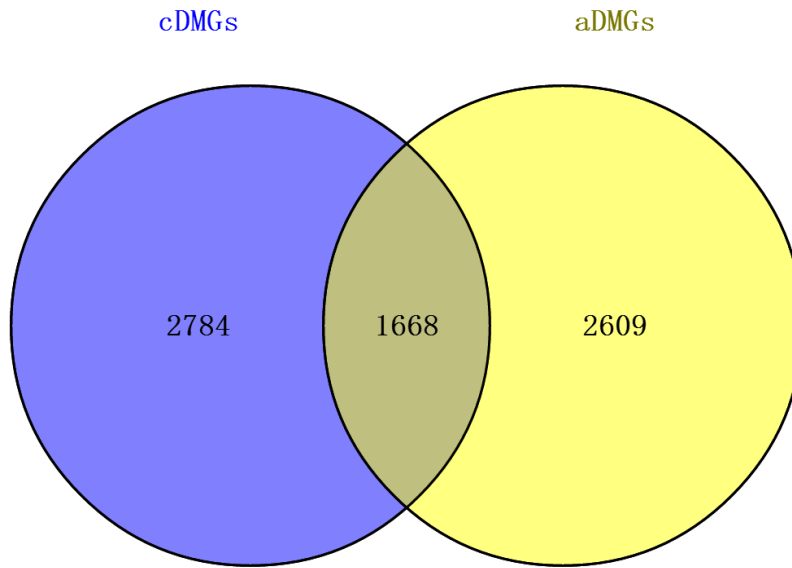

**Supplementary Fig. S2 The overlap of differentially methylated genes in cancer (cDMGs) and differentially methylated genes in aging (aDMGs).**

### Genes only differentially methylated in cancer

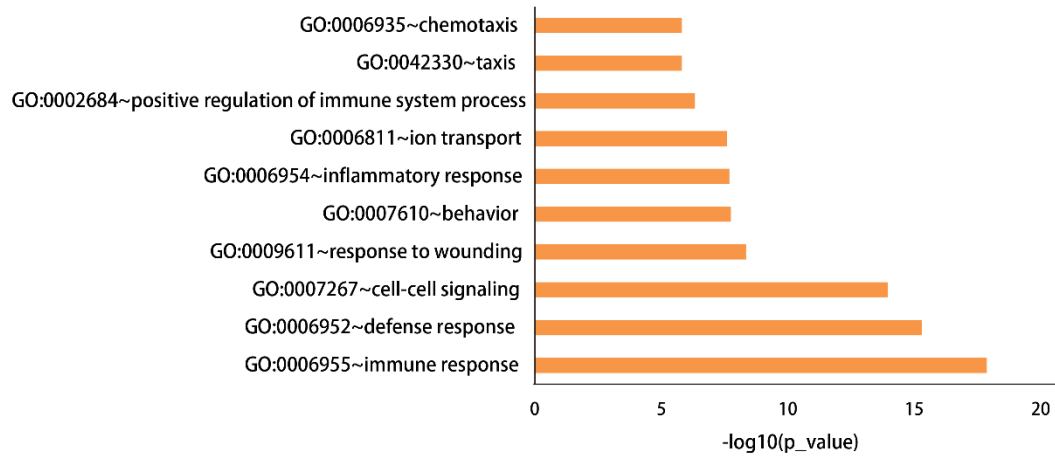

### Genes only differentially methylated in aging

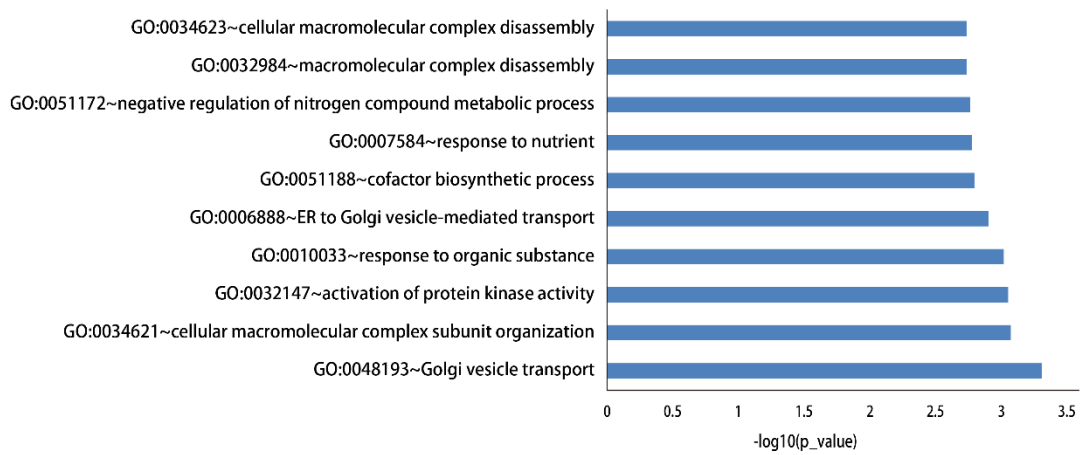

### Overlapped genes

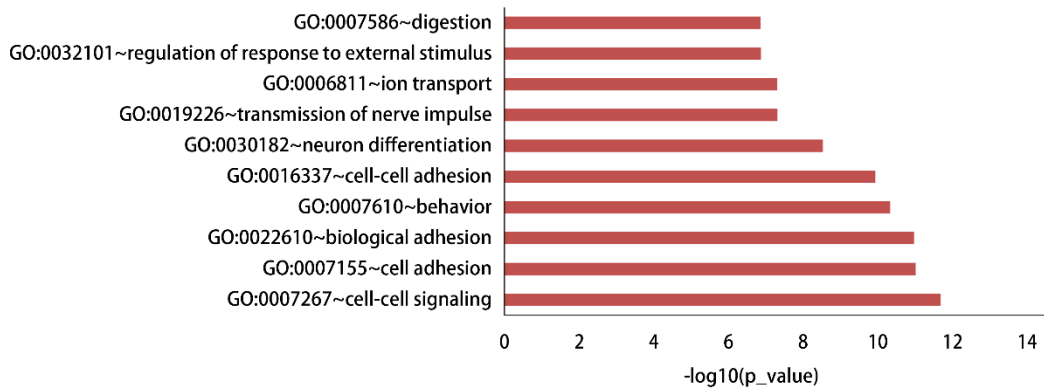

**Supplementary Fig. S3 GO biological process enrichment analysis for genes only differentially methylated in cancer, genes only differentially methylated in aging and overlapped genes**

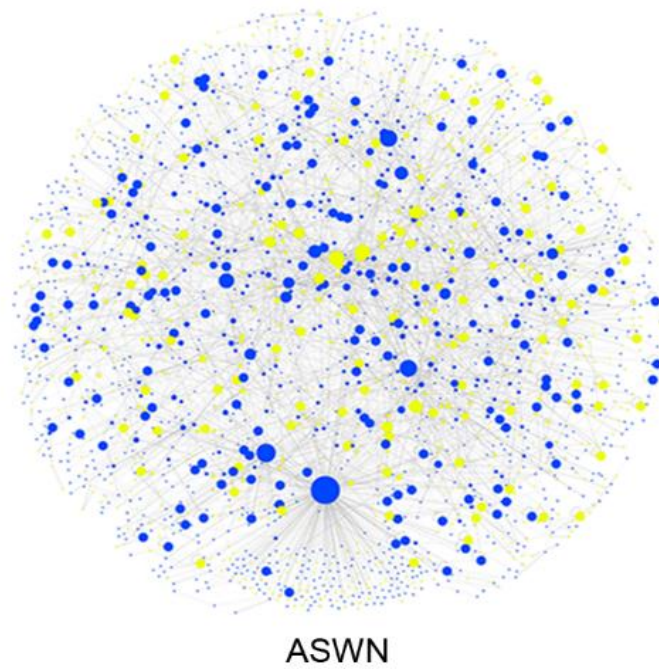

**Supplementary Fig. S4 An age-associated weighted network.** In the ASWN, yellow nodes represent the genes are hyper-aDMGs and blue nodes represent the genes are hypo-aDMGs. The size of a node represents its degree in the network.

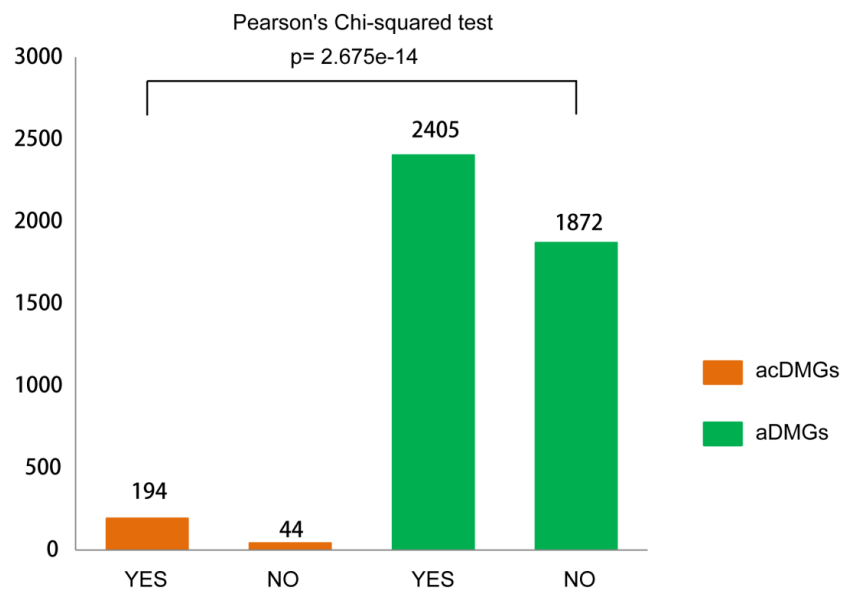

**Supplementary Fig. S5 Pearson's Chi-squared test for numbers of acDMGs and aDMGs in or not in the two patterns described by us.** That hyper-aDMGs in the

module are more tended to be in low methylation pattern and hypo-aDMGs are more tend to be in high methylation pattern. “YES” represents genes are in one of the two patterns, and “NO” represents genes are not in any of the two patterns.

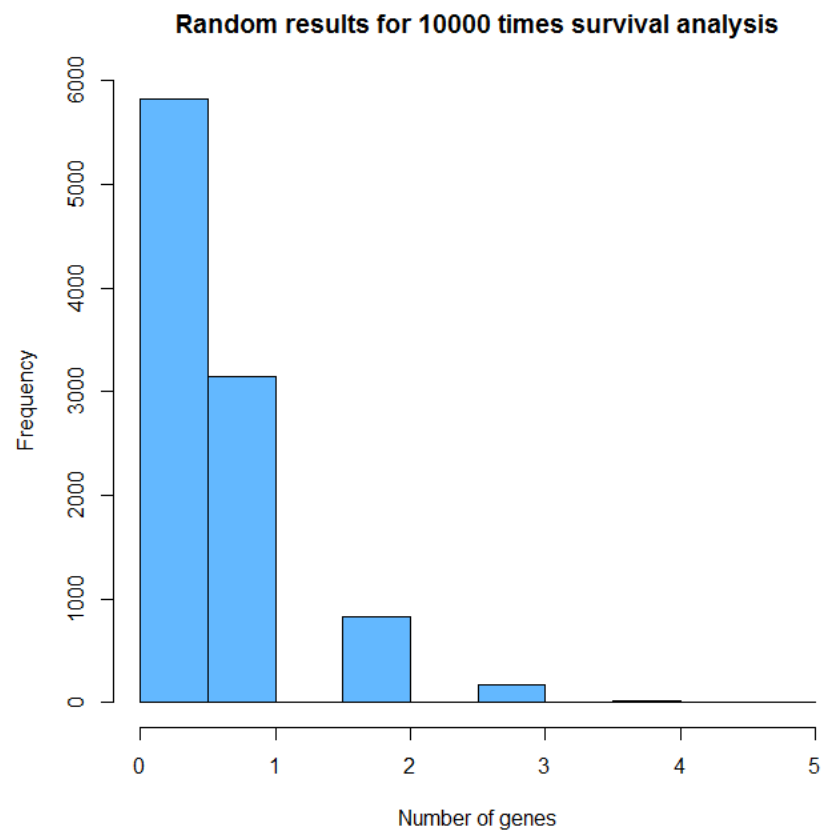

**Supplementary Fig. S6 The result of 10000 random processes of survival analysis.**

The number of genes which both age-associated and prognostic-associated in a survival analysis (x-axis) and frequency of each number (y-axis).

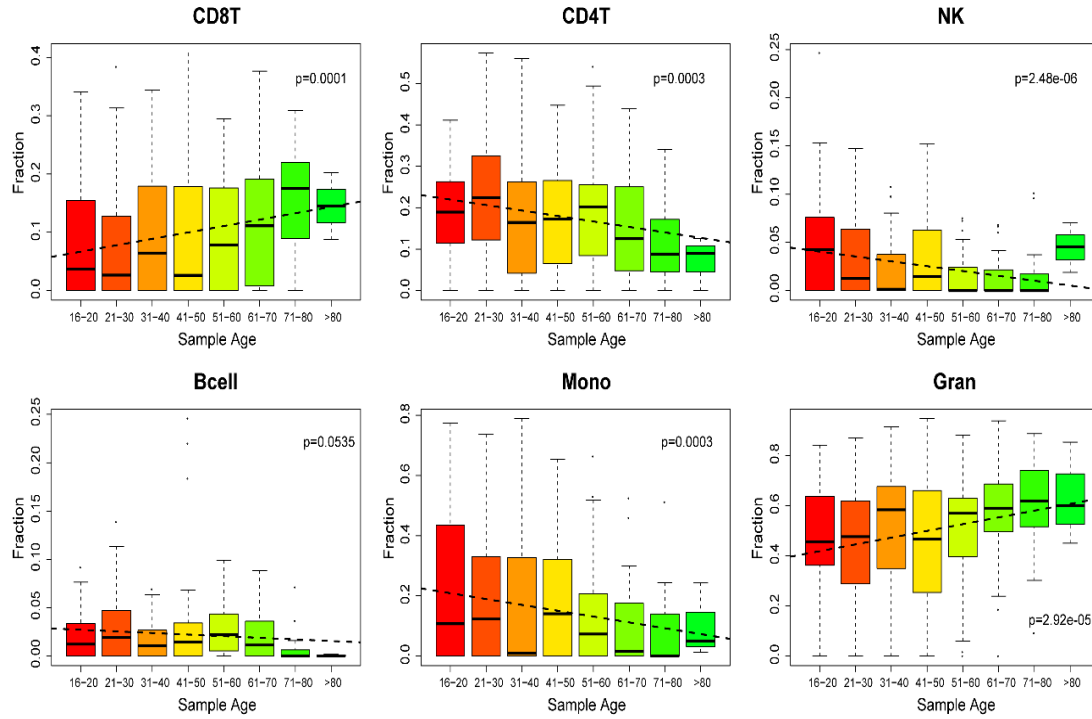

**Supplementary Fig. S7** Boxplots showing the change of methylation in cell proportions in our data. Each plot represents one blood cell subtype. A linear regression line and P-value has been added to each plot.

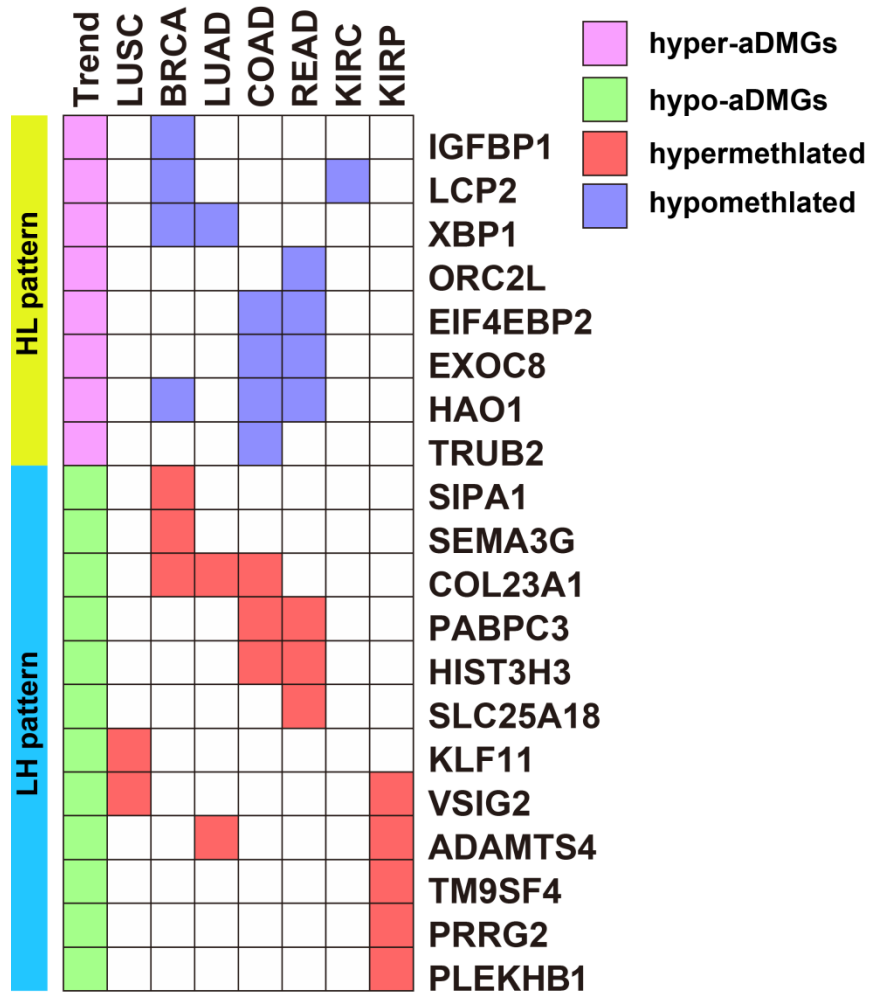

**Supplementary Fig. S8 Two additional patterns (HL pattern and LH pattern).**In HL pattern, the methylation level of a gene is increasing with aging and lower in cancer than normal. While in LH pattern, the methylation level of a gene is decreasing with aging and higher in cancer than normal.

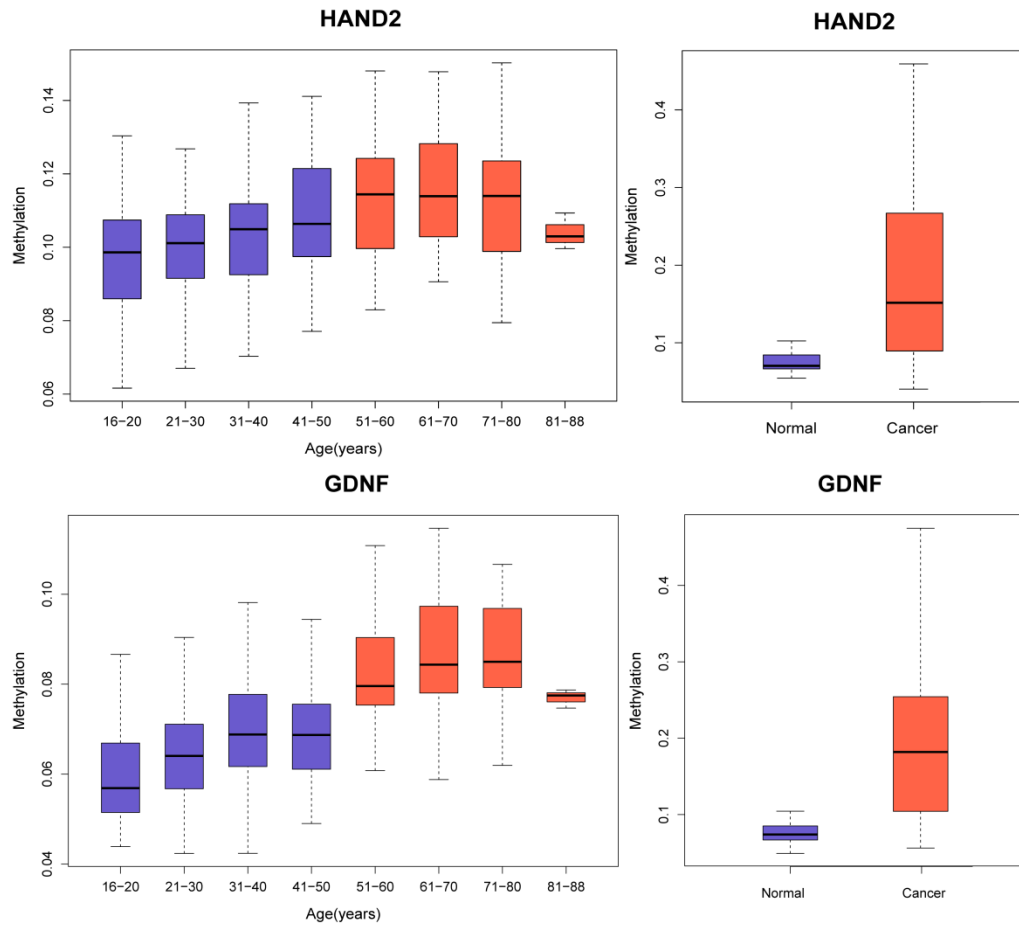

**Supplementary Fig. S9 Comparison of methylation distribution of gene HAND2 and GDNF in age samples and TCGA KIRC samples.**



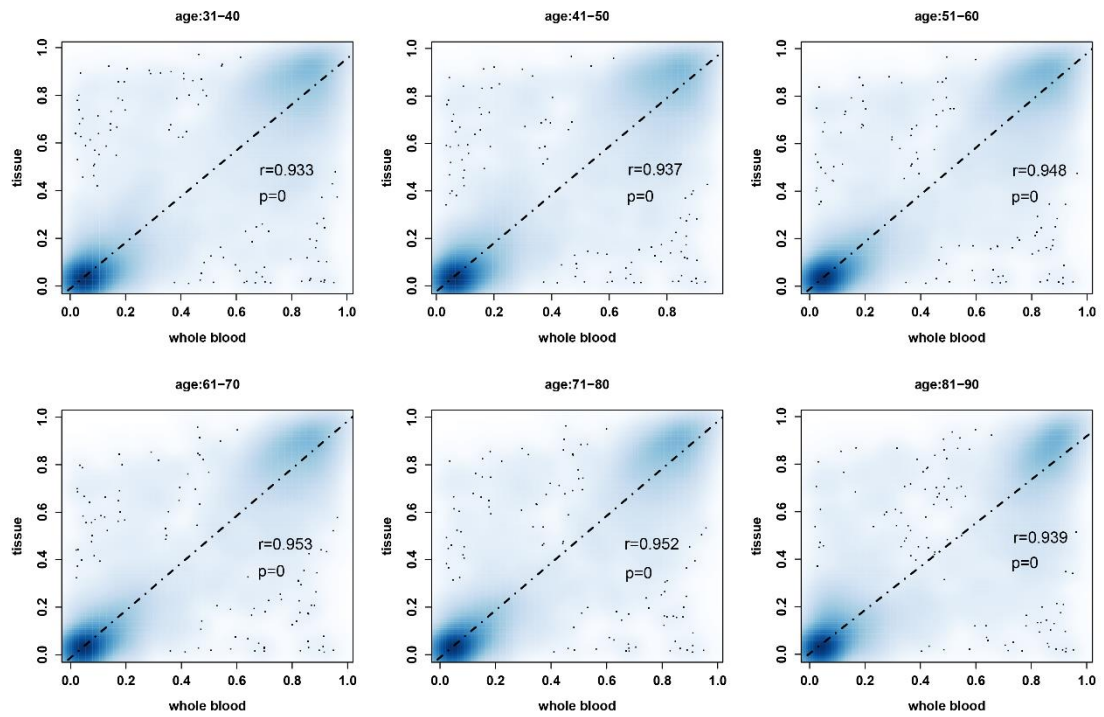

**Supplementary Fig. S10 Comparison of gene methylation between whole blood and normal tissues.** We compared the methylation levels of genes between a whole blood dataset and TCGA seven normal tissues datasets for different stage of age. “r” represented the Pearson correlation coefficient.

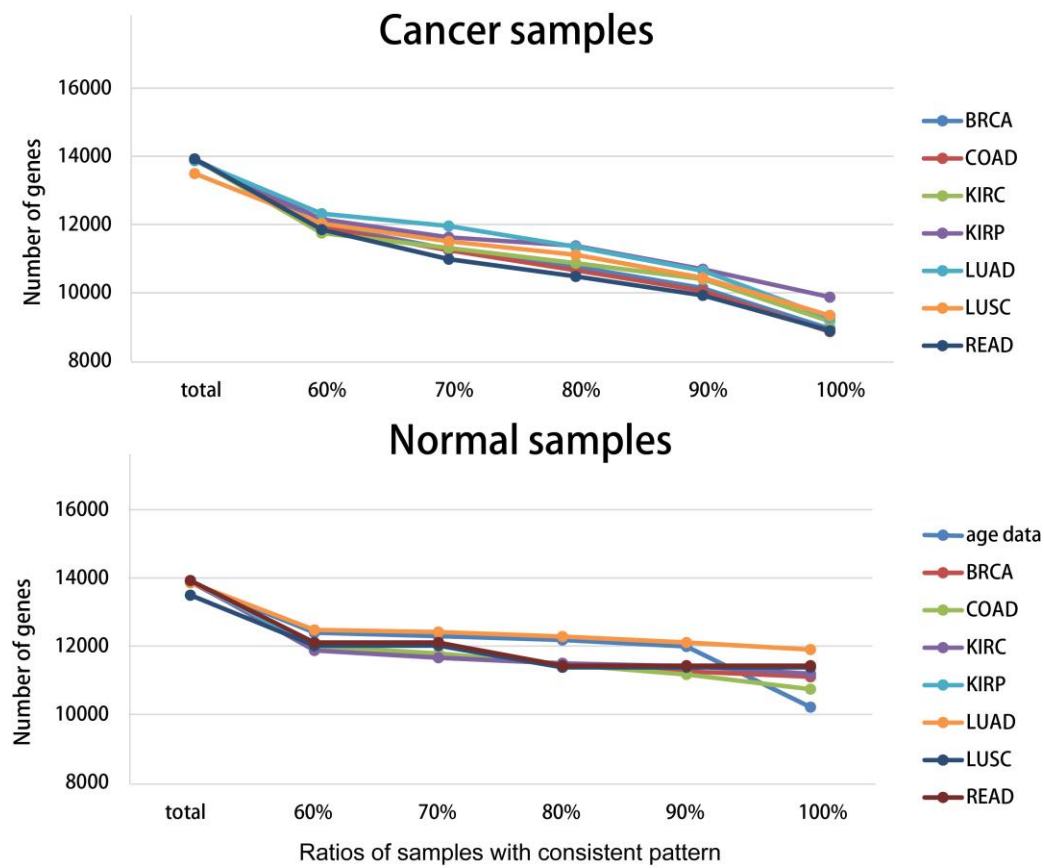

**Supplementary Fig. S11 Comparison of different ratios of samples with consistent pattern.**

## Supplementary Tables

**Table S5 Clinicopathologic characteristics of patients with KIRC in TCGA 27K data (N=218)**

| Characteristics | Number of patients    |                       |                   | <i>p</i> -value   |
|-----------------|-----------------------|-----------------------|-------------------|-------------------|
|                 | All patients<br>N=218 | Training set<br>N=109 | Test set<br>N=109 |                   |
| Stage           |                       |                       |                   | 1 <sup>a</sup>    |
| I               | 115                   | 57                    | 57                |                   |
| II              | 27                    | 14                    | 13                |                   |
| III             | 52                    | 26                    | 26                |                   |
| IV              | 25                    | 12                    | 13                |                   |
| Age             |                       |                       |                   | 0.68 <sup>b</sup> |
| Mean±SD         | 59.55±12.51           | 60.01±12.21           | 59.31±12.69       |                   |
| Range           | 33-86                 | 34-86                 | 33-85             |                   |
| Sex             |                       |                       |                   | 1 <sup>a</sup>    |
| Female          | 77                    | 39                    | 38                |                   |
| Male            | 141                   | 70                    | 71                |                   |
| Survival(month) |                       |                       |                   | 0.93 <sup>b</sup> |
| Mean±SD         | 41.72±24.91           | 41.55±25.76           | 41.89±24.15       |                   |
| Range           | 0.07-112.57           | 0.5-112.57            | 0.07-102.47       |                   |
| State           |                       |                       |                   | 1 <sup>a</sup>    |
| Living          | 153                   | 76                    | 77                |                   |
| Death           | 65                    | 33                    | 32                |                   |

<sup>a</sup> *p*-values were determined using Fisher's exact test.

<sup>b</sup> *p*-values were determined using Student's t- test.

**Table S6 Table S6 The number of TCGA HumanMethylation27 samples used in this study.**

|      | Experiment dataset |        | Validation dataset |        |
|------|--------------------|--------|--------------------|--------|
|      | cancer             | normal | cancer             | normal |
| BRCA | 44                 | 20     | 272                | 7      |
| COAD | 31                 | 17     | 135                | 20     |
| KIRC | 34                 | 25     | 184                | 174    |
| KIRP | 16                 | 5      | 16                 | 5      |
| LUAD | 35                 | 17     | 91                 | 7      |
| LUSC | 36                 | 27     | 98                 | 27     |
| READ | 31                 | 4      | 35                 | 5      |
